# Supplementary material for: A spike-modified Middle East respiratory syndrome coronavirus (MERS-CoV) infectious clone elicits mild respiratory disease in infected rhesus macaques
Source: PubMed Central journal article supplement (PMC6048037; doi:10.1038/s41598-018-28900-1), 2018-07-16
Supplement: 41598_2018_28900_MOESM1_ESM.pdf [file 41598_2018_28900_MOESM1_ESM.pdf]

## **Supplementary Information**

A spike-modified Middle East respiratory syndrome coronavirus (MERS-CoV) infectious clone elicits mild respiratory disease in infected rhesus macaques.

Adam S. Cockrell\*, Joshua C. Johnson, Ian N. Moore, David X. Liu, Kevin W. Bock, Madeline G. Douglas, Rachel L. Graham, Jeffrey Solomon, Lisa Torzewski, Christopher Bartos, Randy Hart, Ralph S. Baric\*<sup>#</sup>, Reed F. Johnson\*<sup>#</sup>

\*Co-corresponding authors: Address Correspondance to: A.S.C. ([adam\\_cockrell@unc.edu](mailto:adam_cockrell@unc.edu)), R.S.B. ([baric@email.unc.edu](mailto:baric@email.unc.edu)), or R.F.J. ([johnsonreed@niaid.nih.gov](mailto:johnsonreed@niaid.nih.gov))

<sup>#</sup>Co-senior authors: R.S.B and R.F.J.

## **Supplementary Tables 1-5**

## **Supplementary Figures 1-2**

**Supplemental Table 1. Microscopic findings in the lung.**

| Lesions               |                                                   | NHP6                | NHP3                | NHP5   | NHP2                 | NHP1                | NHP4   |
|-----------------------|---------------------------------------------------|---------------------|---------------------|--------|----------------------|---------------------|--------|
|                       |                                                   | Day 5 Post-Exposure |                     |        | Day 30 Post-Exposure |                     |        |
| Alveoli               | Edema & fibrin                                    | 3 (fe)              | 2 (fe)              | 1 (mf) | 0                    | 3 (fe)              | 0      |
|                       | Hemorrhage                                        | 3 (fe)              | 2 (fe)              | 2 (fe) | 0                    | 1 (fe)              | 0      |
|                       | Emphysema <sup>1</sup>                            | 2 (mf)              | 2 (mf)              | 2 (mf) | 0                    | 2 (mf)              | 2 (mf) |
|                       | Histiocytosis                                     | 1 (mf)              | 2 (fe) <sup>2</sup> | 1 (mf) | 0                    | 2 (mf) <sup>4</sup> | 1 (mf) |
| Septa                 | Type II pneumocyte hyperplasia                    | 2 (fe)              | 2 (fe)              | 1 (mf) | 0                    | 0                   | 0      |
|                       | Smooth muscle hyperplasia                         | 2 (mf)              | 2 (fe)              | 2 (mf) | 1 (mf)               | 2 (fe)              | 3 (fe) |
|                       | Fibrosis                                          | 2 (mf)              | 2 (fe)              | 1 (mf) | 0                    | 2 (fe)              | 2 (fe) |
|                       | Infiltrates of lympho-plasmacytic-monocytic cells | 2 (mf)              | 1 (mf)              | 1 (mf) | 0                    | 2 (fe)              | 2 (fe) |
| Blood vessels         | Congestion                                        | 2 (mf)              | 2 (mf)              | 2 (mf) | 0                    | 1 (mf)              | 0      |
|                       | Perivascularitis                                  | 2 (mf)              | 2 (mf)              | 1 (mf) | 0                    | 1 (mf)              | 0      |
|                       | BALT <sup>3</sup> hyperplasia                     | 0                   | 0                   | 0      | 2 (mf)               | 2 (mf)              | 2 (mf) |
| Bronchi & bronchioles | Collapsed                                         | 2 (mf)              | 2 (mf)              | 1 (mf) | 2 (mf)               | 1 (mf) <sup>5</sup> | 2 (mf) |
|                       | Goblet cell hyperplasia                           | 0                   | 0                   | 0      | 2 (mf)               | 2 (mf)              | 2 (mf) |
| Pleura                | Lymphoplasmacytic and edematous                   | 2 (df)              | 0                   | 0      | 0                    | 0                   | 0      |

Abbreviations: fe, focally extensive; mf, multifocal; df, diffuse. Qualitative scoring scale: 0, within normal limits; 1, mild; 2, moderate; 3, significant; 4, severe. <sup>1</sup> Filled with eosinophilic to basophilic fibrillar material; <sup>2</sup> Many multinucleate giant cells and plant material; <sup>3</sup> BALT, bronchial associated lymphoid tissue; <sup>4</sup> Granulomas with nematodes; <sup>5</sup> Filled with large amount of mucinous material and cell debris.

**Supplemental Table 2. Microscopic findings in the lymphoid organs.**

| Lesions               |                                    | NHP6                | NHP3                | NHP5                | NHP2                 | NHP1                | NHP4                |
|-----------------------|------------------------------------|---------------------|---------------------|---------------------|----------------------|---------------------|---------------------|
|                       |                                    | Day 5 Post-Exposure |                     |                     | Day 30 Post-Exposure |                     |                     |
| Axillary lymph node   | Lymphoid depletion and hyperplasia | 1 (df)              | 2 (df)              | 2 (df)              | 2 (mf)               | 0                   | 0                   |
|                       | Lymphocytic hyperplasia            | 2 (df)              | 3 (df)              | 2 (df)              | 2 (df)               | 0                   | 2 (df)              |
|                       | Sinus dilatation                   | 2 (df)              | 0                   | 0                   | 0                    | 0                   | 0                   |
|                       | Hystiocytosis                      | 2 (mf)              | 2 (df)              | 2 (df)              | 2 (df)               | 2 (mf)              | 1 (mf)              |
| Inguinal lymph node   | Lymphoid depletion and hyperplasia | NA                  | 2 (df)              | 2 (df)              | 0                    | 0                   | 0                   |
|                       | Lymphocytic hyperplasia            |                     | 3 (df)              | 2 (df)              | 2 (df)               | 0                   | 2 (fe)              |
|                       | Sinus dilatation                   |                     | 0                   | 0                   | 0                    | 0                   | 0 (fe)              |
|                       | Hystiocytosis                      |                     | 2 (mf) <sup>1</sup> | 2 (df)              | 2 (df)               | 2 (fe)              | 1 (fe)              |
| Mesenteric lymph node | Lymphoid depletion and hyperplasia | 0                   | 0                   | 3 (mf)              | 3 (mf)               | 2 (mf)              | 1 (mf)              |
|                       | Lymphocytic hyperplasia            | 0                   | 0                   | 0                   | 0                    | 0                   | 0                   |
|                       | Sinus dilatation                   | 2 (mf)              | 2 (mf)              | 0                   | 0                    | 0                   | 0                   |
|                       | Hystiocytosis                      | 2 (mf)              | 2 (mf)              | 2 (mf) <sup>2</sup> | 2 (df) <sup>3</sup>  | 2 (mf) <sup>2</sup> | 2 (mf) <sup>2</sup> |
| Bronchial lymph node  | Lymphoid depletion and hyperplasia | NA                  | 2 (mf)              | 0                   | 3 (mf)               | 2 (mf)              | 1 (mf)              |
|                       | Lymphocytic hyperplasia            |                     | 2 (df)              | 2 (df)              | 0                    | 0                   | 0                   |
|                       | Sinus dilatation                   |                     | 0                   | 0                   | 0                    | 0                   | 0                   |
|                       | Hystiocytosis                      |                     | 0                   | 0                   | 0                    | 0                   | 0                   |
| Spleen                | Lymphoid depletion and hyperplasia | 2 (mf)              | 2 (df)              | 0                   | 0                    | 0                   | 0                   |
|                       | Lymphocytic hyperplasia            | 2 (mf)              | 2 (df)              | 0                   | 0                    | 0                   | 0                   |
|                       | Sinus dilatation                   | 0                   | 0                   | 0                   | 0                    | 0                   | 0                   |
|                       | Hystiocytosis                      | 0                   | 0                   | 0                   | 0                    | 0                   | 0                   |

Abbreviations: fe, focally extensive; mf, multifocal; df, diffuse. Qualitative scoring scale: 0, within normal limits; 1, mild; 2, moderate; 3, significant; 4, severe. <sup>1</sup> with mild hemosiderionosis; <sup>2</sup> Granulomas with nematodes; <sup>3</sup> Granulomatous inflammation;

**Supplemental Table 3. Incidental microscopic findings.**

| Organ / Lesions      |  | NHP6                               | NHP3 | NHP5   | NHP2                 | NHP1   | NHP4   |
|----------------------|--|------------------------------------|------|--------|----------------------|--------|--------|
|                      |  | Day 5 Post-Exposure                |      |        | Day 30 Post-Exposure |        |        |
| Skin & mammary gland |  | 0                                  | 0    | 0      | 0                    | 0      | 0      |
| Kidney               |  | Lymphocytic interstitial nephritis |      |        |                      |        |        |
|                      |  | 1 (mf)                             | 0    | 0      | 0                    | 0      | 1 (mf) |
| Heart                |  | Lymphoplasmacytic perivascularitis |      |        |                      |        |        |
|                      |  | 1 (mf)                             | 0    | 0      | 1 (mf)               | 0      | 0      |
|                      |  | Adipose tissue infiltration        |      |        |                      |        |        |
|                      |  | 2 (mf)                             | 0    | 0      | 0                    | 0      | 0      |
|                      |  | Fibrosis                           |      |        |                      |        |        |
|                      |  | 1 (mf)                             | 0    | 0      | 1 (mf)               | 1 (mf) | 0      |
| Tongue               |  | 0                                  | 0    | 0      | 0                    | 0      | 0      |
| Liver                |  | Lipidosis                          |      |        |                      |        |        |
|                      |  | 2 (mf)                             | 0    | 2 (mf) | 0                    | 0      | 0      |
|                      |  | Lymphoplasmacytic                  |      |        |                      |        |        |
|                      |  | 0                                  | 0    | 0      | 1 (mf)               | 0      | 0      |
| Brain                |  | Lymphoplasmacytic                  |      |        |                      |        |        |
|                      |  | 0                                  | 0    | 0      | 1 (mf)               | 0      | 0      |
| Pituitary gland      |  | 0                                  | 0    | 0      | 0                    | 0      | 0      |

Abbreviations: mf, multifocal. Qualitative scoring scale: 0, within normal limits; 1, mild; 2, moderate; 3, significant; 4, severe.

**Supplementary Table 4. Results of MERS-CoV real-time quantitative polymerase chain reaction. All real-time runs were 45 cycles. The positive control was an infected sample from a human primary lung culture.**

| Primate # | Sample Number | Day PE | Lung Sample Ct Values |      |       |
|-----------|---------------|--------|-----------------------|------|-------|
|           |               |        | ORF1                  | ORFN | 18S   |
| NHP1      | 1             | 30     | N                     | N    | 16.88 |
|           | 1             | 30     | N                     | N    | 15.86 |
|           | 2             | 30     | N                     | N    | 14.99 |
|           | 2             | 30     | N                     | N    | 14.03 |
| NHP2      | 1             | 30     | N                     | N    | 13.37 |
|           | 1             | 30     | N                     | N    | 12.78 |
|           | 2             | 30     | N                     | N    | 12.73 |
|           | 2             | 30     | N                     | N    | 12.91 |
| NHP3      | 1             | 5      | N                     | N    | 13.34 |
|           | 1             | 5      | N                     | N    | 13.57 |
|           | 2             | 5      | N                     | N    | 15.20 |
|           | 2             | 5      | N                     | N    | 15.26 |
| NHP4      | 1             | 30     | N                     | N    | 11.81 |
|           | 1             | 30     | N                     | N    | 12.33 |
|           | 2             | 30     | N                     | N    | 13.16 |
|           | 2             | 30     | N                     | N    | 12.74 |
| NHP5      | 1             | 5      | N                     | N    | 16.52 |
|           | 1             | 5      | N                     | N    | 15.91 |

|                         |     |     |       |             |       |
|-------------------------|-----|-----|-------|-------------|-------|
|                         | 2   | 5   | N     | N           | 16.77 |
|                         | 2   | 5   | N     | N           | 17.05 |
| <b>NHP6</b>             | 1   | 5   | N     | N           | 20.57 |
|                         | 1   | 5   | N     | N           | 20.98 |
|                         | 2   | 5   | N     | N           | 17.05 |
|                         | 2   | 5   | N     | N           | 16.24 |
| <b>Positive Control</b> | n/a | n/a | 15.41 | 21.68333333 | 11.54 |

Abbreviations: PE, post-exposure; 18S, eukaryotic 18S; N, negative (no reads through 45 cycles).

**Supplemental Table 5. Coronavirus genomic and subgenomic real-time primer sets and control primers.**

| <b>Primer Name</b>  | <b>Primer Sequence (5'-3')</b> |
|---------------------|--------------------------------|
| MERS Leader Forward | GAATAGCTTGGCTATCTCAC           |
| MERS ORF1 Reverse   | CACAATCCCACCAGACAA             |
| MERS ORFN Reverse   | TTGTTATCGGCAAAGGAAAC           |
| Euk18S Forward*     | AATTTGACTCAACACGGG             |
| Euk18S Reverse*     | ACTAAGAACGGCCATGCACC           |

\* The eukaryotic housekeeping gene 18S (Euk18S) was used for normalization of real-time results.

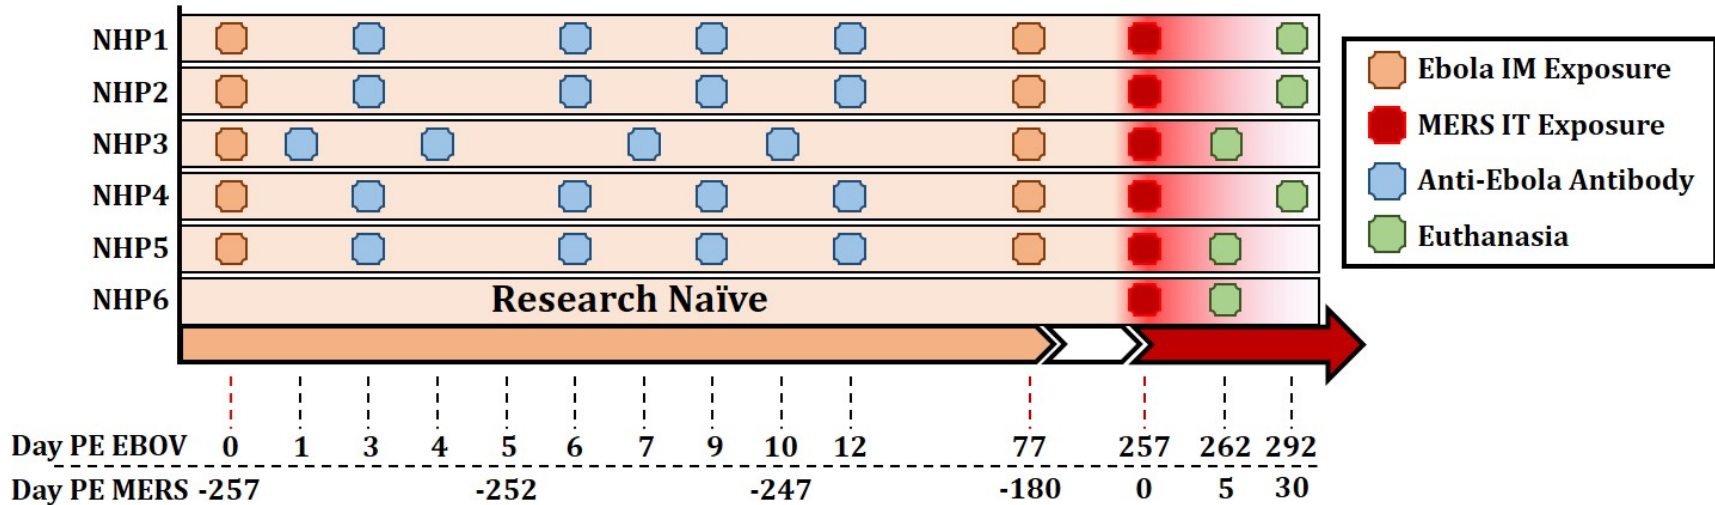

**Supplemental Figure 1. Nonhuman primate research history.** Five of the six nonhuman primates used for the performance of this study survived two previous intramuscular exposures to Ebola virus (2300 plaque-forming units and 611 plaque-forming units for the first and second Ebola exposure, respectively). Animals survived due to receiving intravenous infusions of anti-Ebola polyclonal antibodies generated from humanized transgenic cows.



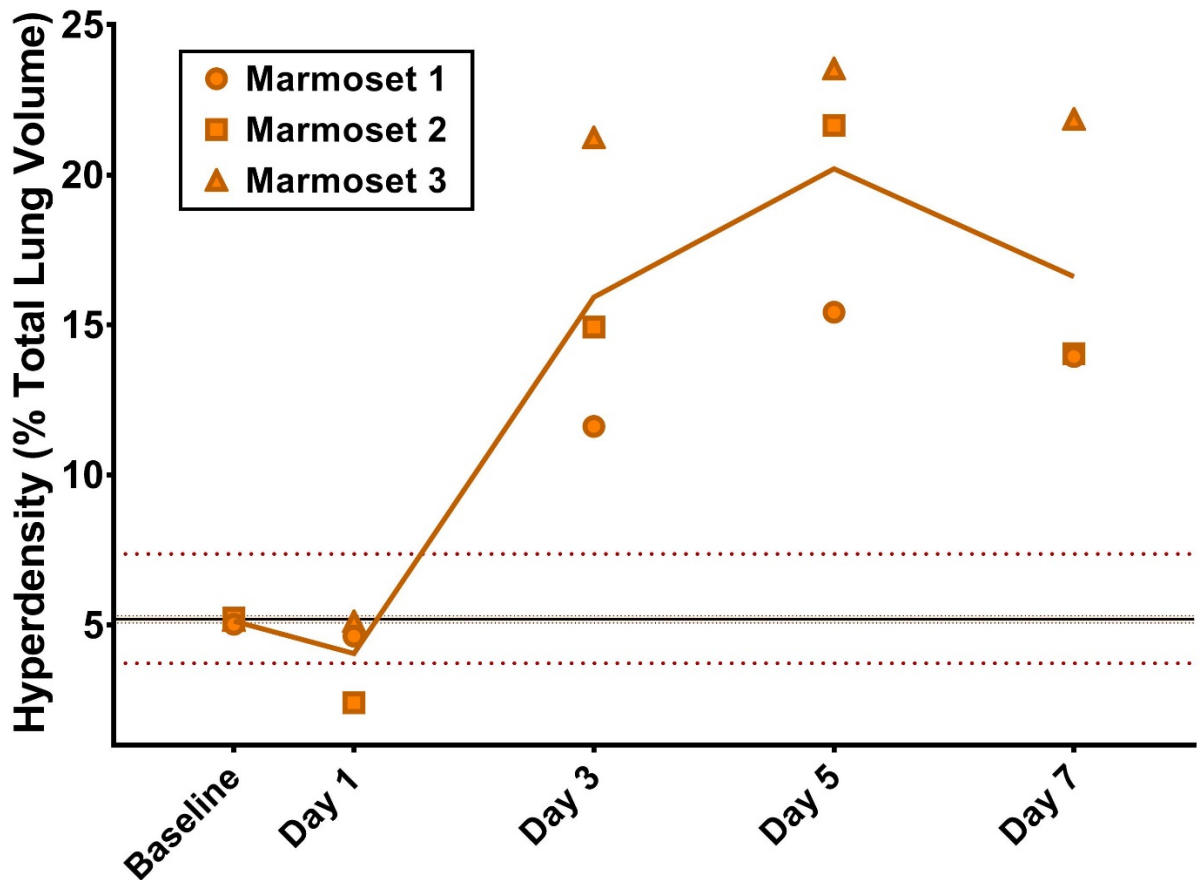

**Supplemental Figure 2.** (A) Representative lung field CT images of a marmoset 1 exposed to  $5 \times 10^7$  PFU MERS EMC virus by the intratracheal route; (B) Lung consolidation depicted as the percentage of the volume of hyperdense voxels in the total lung volume for each MERS EMC virus exposed marmoset. Solid and dotted black lines indicate the baseline mean and 3SD range of the hyperdense volume from icMERS-0 exposed rhesus monkeys. Dotted red lines indicate the upper and lower method range limits of MERS exposed rhesus monkeys (n=33). Marmoset data used in this figure was originally reported in <sup>7</sup>.
